# Supplementary material for: Needle biopsy accelerates pro-metastatic changes and systemic dissemination in breast cancer: Implications for mortality by surgery delay
Source: PubMed Central journal article supplement — Cell Rep Med. 2023 Dec 19;4(12):101330. doi: 10.1016/j.xcrm.2023.101330 (PMC10772461; doi:10.1016/j.xcrm.2023.101330), 2023-12-19
Supplement: mmc1.pdf [file mmc1.pdf]

**Cell Reports Medicine, Volume 4**

**Supplemental information**

**Needle biopsy accelerates pro-metastatic  
changes and systemic dissemination in breast  
cancer: Implications for mortality by surgery delay**

**Hiroyasu Kameyama, Priya Dondapati, Reese Simmons, Macall Leslie, John F. Langenheim, Yunguang Sun, Misung Yi, Aubrey Rottschaefer, Rashmi Pathak, Shreya Nuguri, Kar-Ming Fung, Shirng-Wern Tsaih, Inna Chervoneva, Hallgeir Rui, and Takemi Tanaka**

## Supplementary Information

### **Needle biopsy accelerates pro-metastatic changes and systemic dissemination in breast cancer: Implications for mortality by surgery delay**

Hiroyasu Kameyama, Priya Dondapati, Reese Simmons, Macall Leslie, John F. Langenheimer, Yunguang Sun, Misung Yi, Aubrey Rottschaefer, Rashmi Pathak, Shreya Nuguri, Kar-Ming Fung, Shirng-Wern Tsaih, Inna Chervoneva, Hallgeir Rui, and Takemi Tanaka

#### **Lead Contact:**

Takemi Tanaka, Ph.D., Professor  
University of Oklahoma Health Sciences Center, School of Medicine, Dept. of Pathology,  
Stephenson Cancer Center at 975 NE 10th St, BRC-W, Rm 1415, Oklahoma City, OK 73104  
Email: [takemi-tanaka@ouhsc.edu](mailto:takemi-tanaka@ouhsc.edu)  
Phone: Office (405)-271-8260

**This PDF included Figure S1-S7 and Table S1-S4**

**Figure S1**

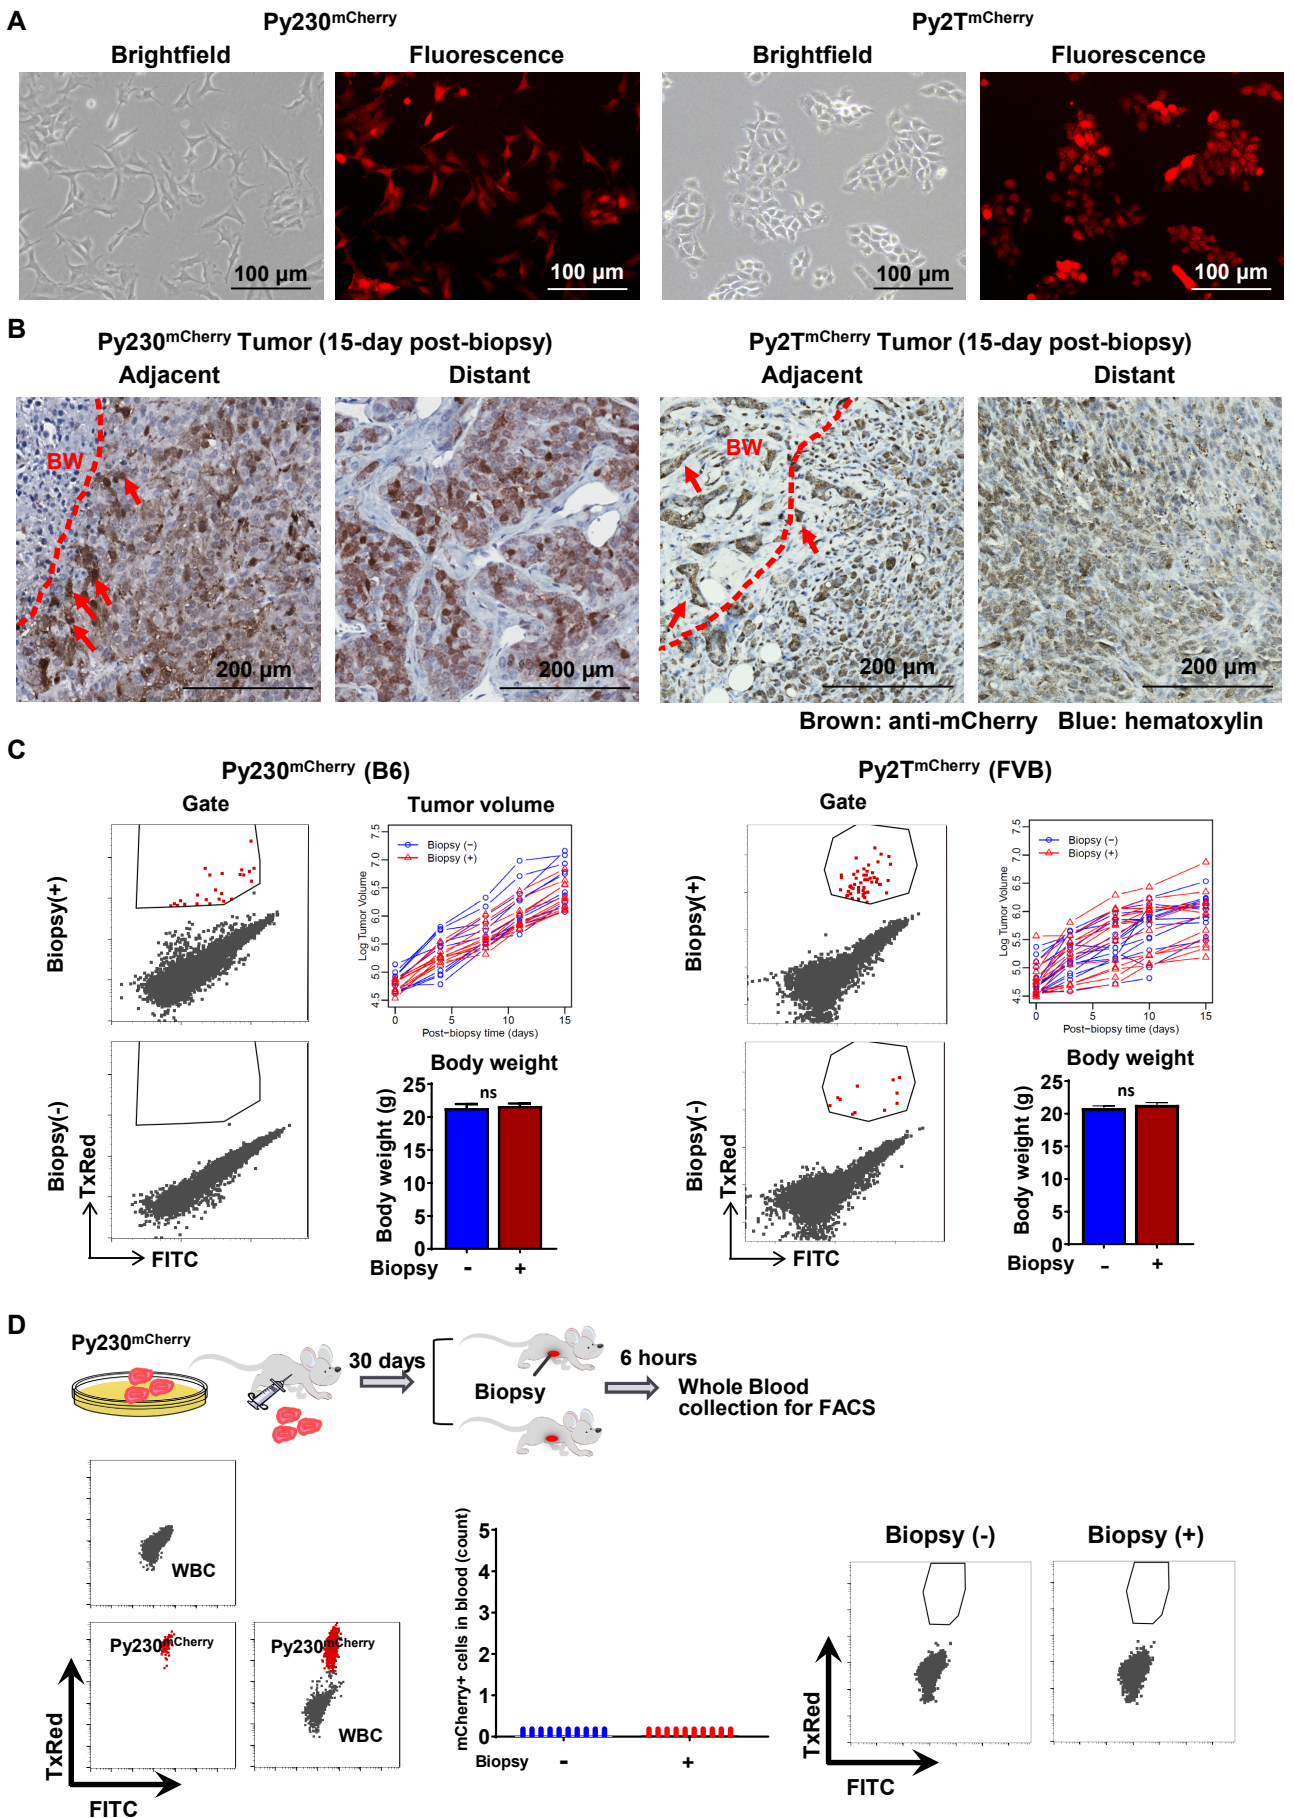

**Figure S1. Needle biopsy of breast tumor does not cause cancer cell displacement, related to Figure 1.**

(A) Brightfield and fluorescent images of Py230<sup>mCherry</sup> and Py2T<sup>mCherry</sup> mouse mammary carcinoma cells. (B) Immunohistochemical staining of mCherry (brown) in 15-day post-biopsy Py230<sup>mCherry</sup> and Py2T<sup>mCherry</sup> tumors both adjacent (left) to and distant (right) from biopsy wound. The slides were counterstained with Hematoxylin (blue). Red arrows indicate spindle-shaped mCherry<sup>+</sup> cancer cells adjacent immediately outside of the wound; the red dotted line indicates the boundary of the biopsy wound. BW: biopsy wound. (C) Representative images of flow cytometric analyses of mCherry-positive BC cells after scatter gating and live cell gating of whole lung of Py230<sup>mCherry</sup> and Py2T<sup>mCherry</sup> tumors. The growth rate of Py230<sup>mCherry</sup> and Py2T<sup>mCherry</sup> tumors derived from mice assigned to study in Figure 1E (n=10-13) and 1F (n=11-12), respectively. Tumor volume of each mouse was plotted over post-biopsy days (biopsy as day 0); *P*-values were calculated using Student's T-test. The endpoint bodyweight of the mice assigned to this study; *P*-values were calculated using Student's T-test. (D) The absence of disseminated Py230<sup>mCherry</sup> cells in the circulation after tumor biopsy. Whole blood was collected from B6 mice by cardiac puncture 6 hours following biopsy of the Py230<sup>mCherry</sup> tumor. Following red blood cell lysis, a single cell suspension of white blood cells (WBCs) was analyzed by flow cytometry (n=10). Flow cytometry gating shows WBCs (gray), Py230<sup>mCherry</sup> cells (red), and Py230<sup>mCherry</sup> and WBC mixture. The graph depicts the absence of Py230<sup>mCherry</sup> cells in the whole blood 6 hours after the biopsy. Representative flow cytometry gating indicates the absence of Py230<sup>mCherry</sup> cells in the peripheral blood regardless of biopsy.

**Figure S2**

**A** 25-day post-biopsy surgical resected clinical BC (whole mount)

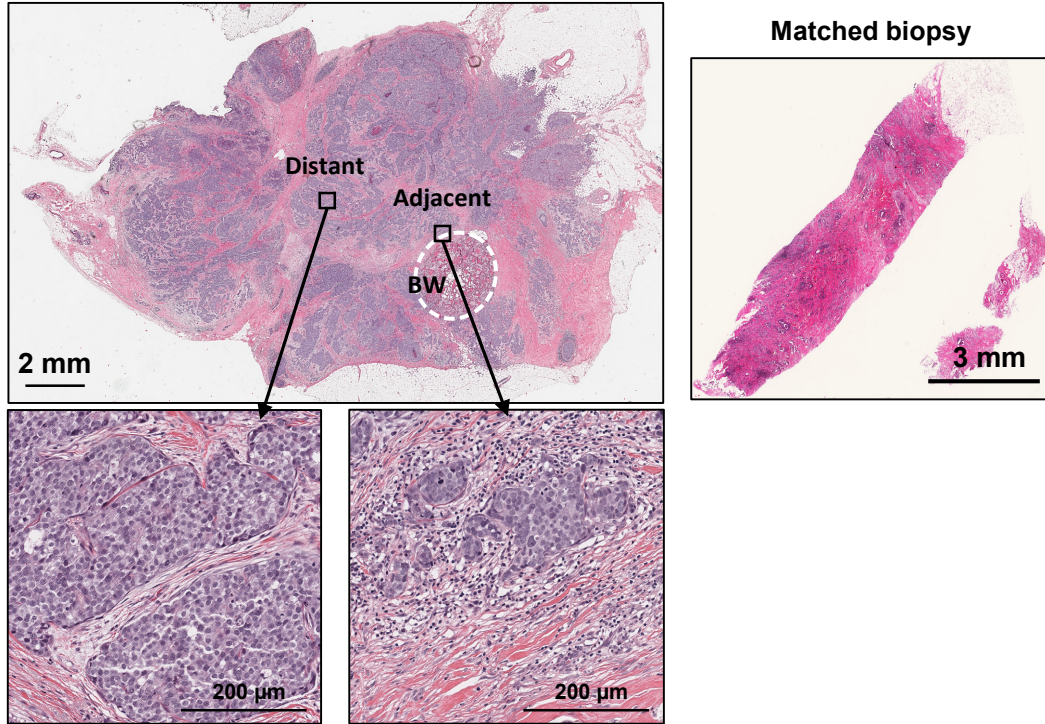

**B** 15-day post-biopsy Py230 tumor (whole mount)

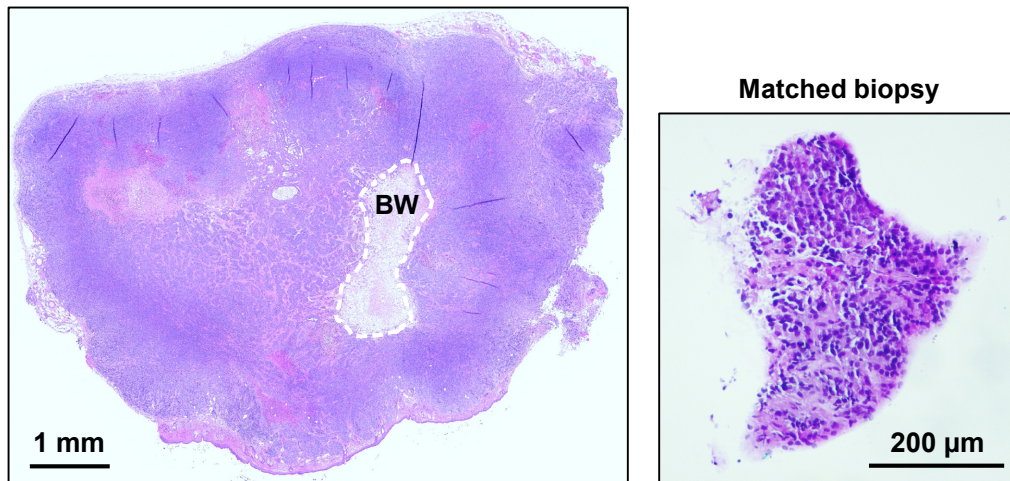

**C** 15-day post-biopsy Py230 tumor

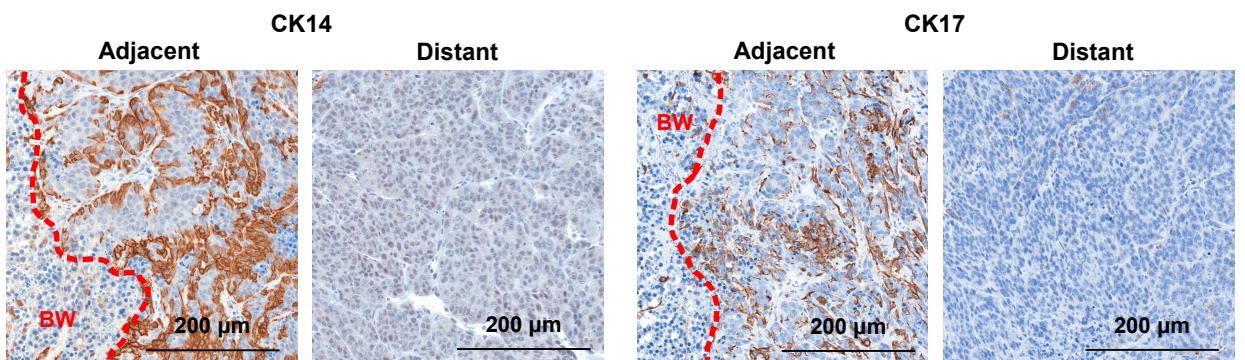

Brown: anti-CK14 or anti-CK17 Blue: hematoxylin

**Figure S2. Prolonged retention of inflammatory cells adjacent to biopsy wound, related to Figure 2.**

(A) Representative H&E image shows the whole mount of surgically resected tumor and the matched biopsy of tumor used for Fig. 2A. The white dotted line indicates the border of the biopsy wound (BW). High-power magnification images of adjacent and distant areas correspond to fluorescent images shown in 2A. (B) H&E image of 15-day post-biopsy Py230 tumor and vertical section of the matched biopsy used for Fig. 2D. The white dotted line indicates the border from the biopsy wound (BW). (C) Immunohistochemical staining of CK14 and CK17 (brown) in 15-day post-biopsy Py230<sup>mCherry</sup> tumors both adjacent (left) to and distant (right) from the biopsy wound. Red dotted line indicates the border of biopsy wound (BW).

**Figure S3**

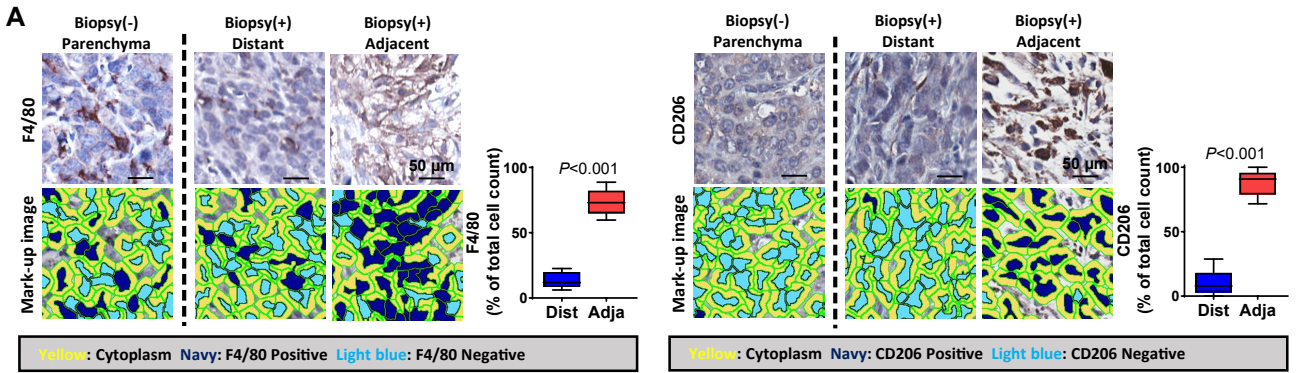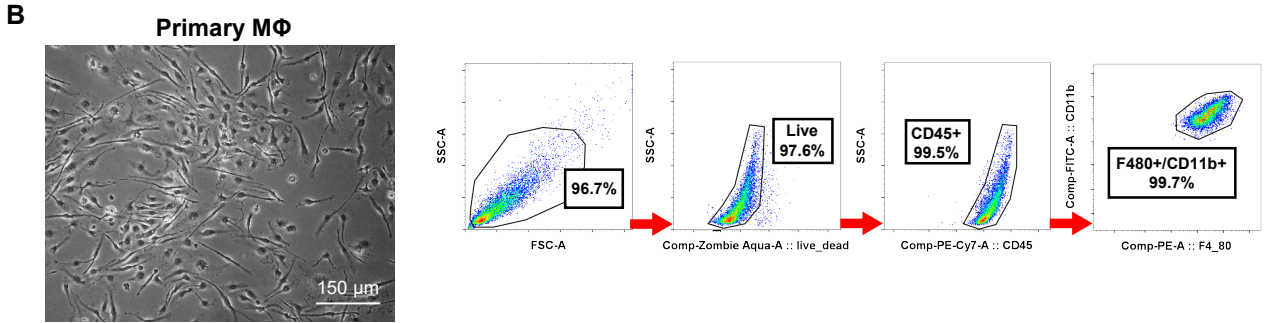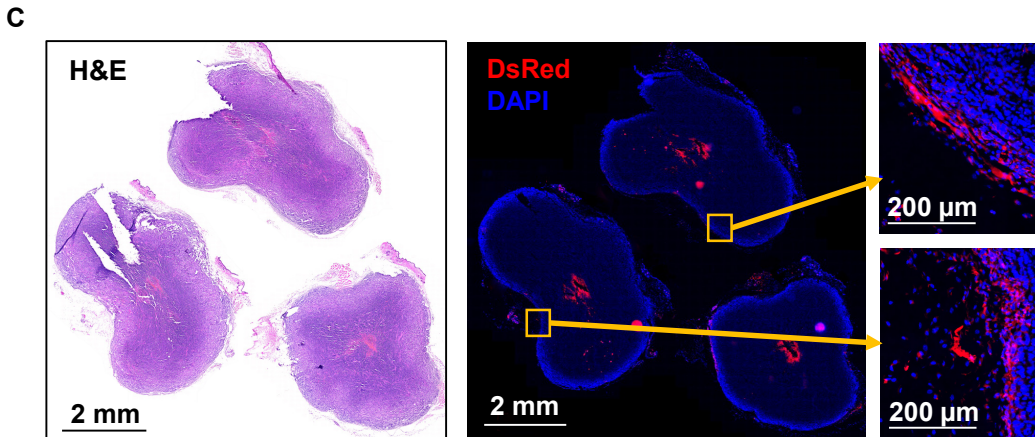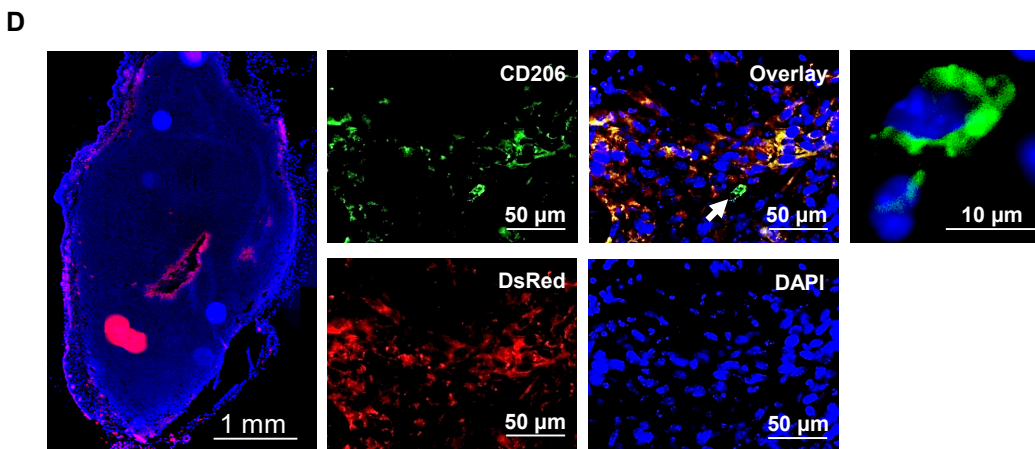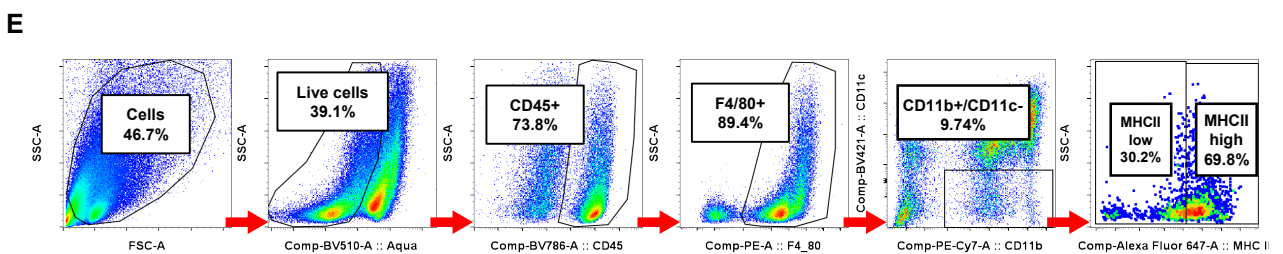

**Figure S3. M2 $\phi$  accumulation emerged as early as one day after biopsy in Py230 tumors, related to Figure 3.**

(A) Algorithm used for the quantification of F4/80+ and CD206+ IHC-stained cells using Aperio Image Suite. Representative images of F4/80 and CD206 expression in unbiopsied Py230 tumor (left), distant from biopsy wound (middle), and adjacent to biopsy wound (right). Graphs depict the percentage of positive cells normalized by nucleus count (n=13). *P*-values were calculated using Wilcoxon test. (B) Brightfield image of bone marrow-derived primary M $\phi$  isolated from B6 female mice. Flow cytometry gating of bone marrow-derived primary M $\phi$ <sup>DsRed</sup>. (C) Scanned image of 1-day post-biopsy Py230 tumors of mice that received M $\phi$ <sup>DsRed</sup> adoptive transfer. The whole mount of three independent tumor images shows local accumulation of M $\phi$ <sup>DsRed</sup> (red) around the biopsy wound (center hollow), nuclear counterstain with DAPI (blue), and corresponding H&E image. High-power images corresponding to orange squares indicate M $\phi$ <sup>DsRed</sup> infiltration into the distant peripheral stroma. (D) Images of biopsied Py230 tumors in mice that received M $\phi$ <sup>DsRed</sup> adoptive transfer, immunofluorescently stained with FITC-labeled anti-CD206 (green) and counterstained with DAPI (blue). White arrow indicates CD206<sup>+</sup>/mCherry<sup>-</sup> cells. BW: biopsy wound. (E) Flow cytometry gating of M $\phi$  immune-profiling for M1 $\phi$ : CD45<sup>+</sup>F4/80<sup>+</sup>CD11b<sup>+</sup>/CD11c<sup>-</sup>MHC<sup>high</sup> and M2 $\phi$ : CD45<sup>+</sup>F4/80<sup>+</sup>CD11b<sup>+</sup>/CD11c<sup>-</sup>MHCII<sup>low</sup>.



**Figure S4**

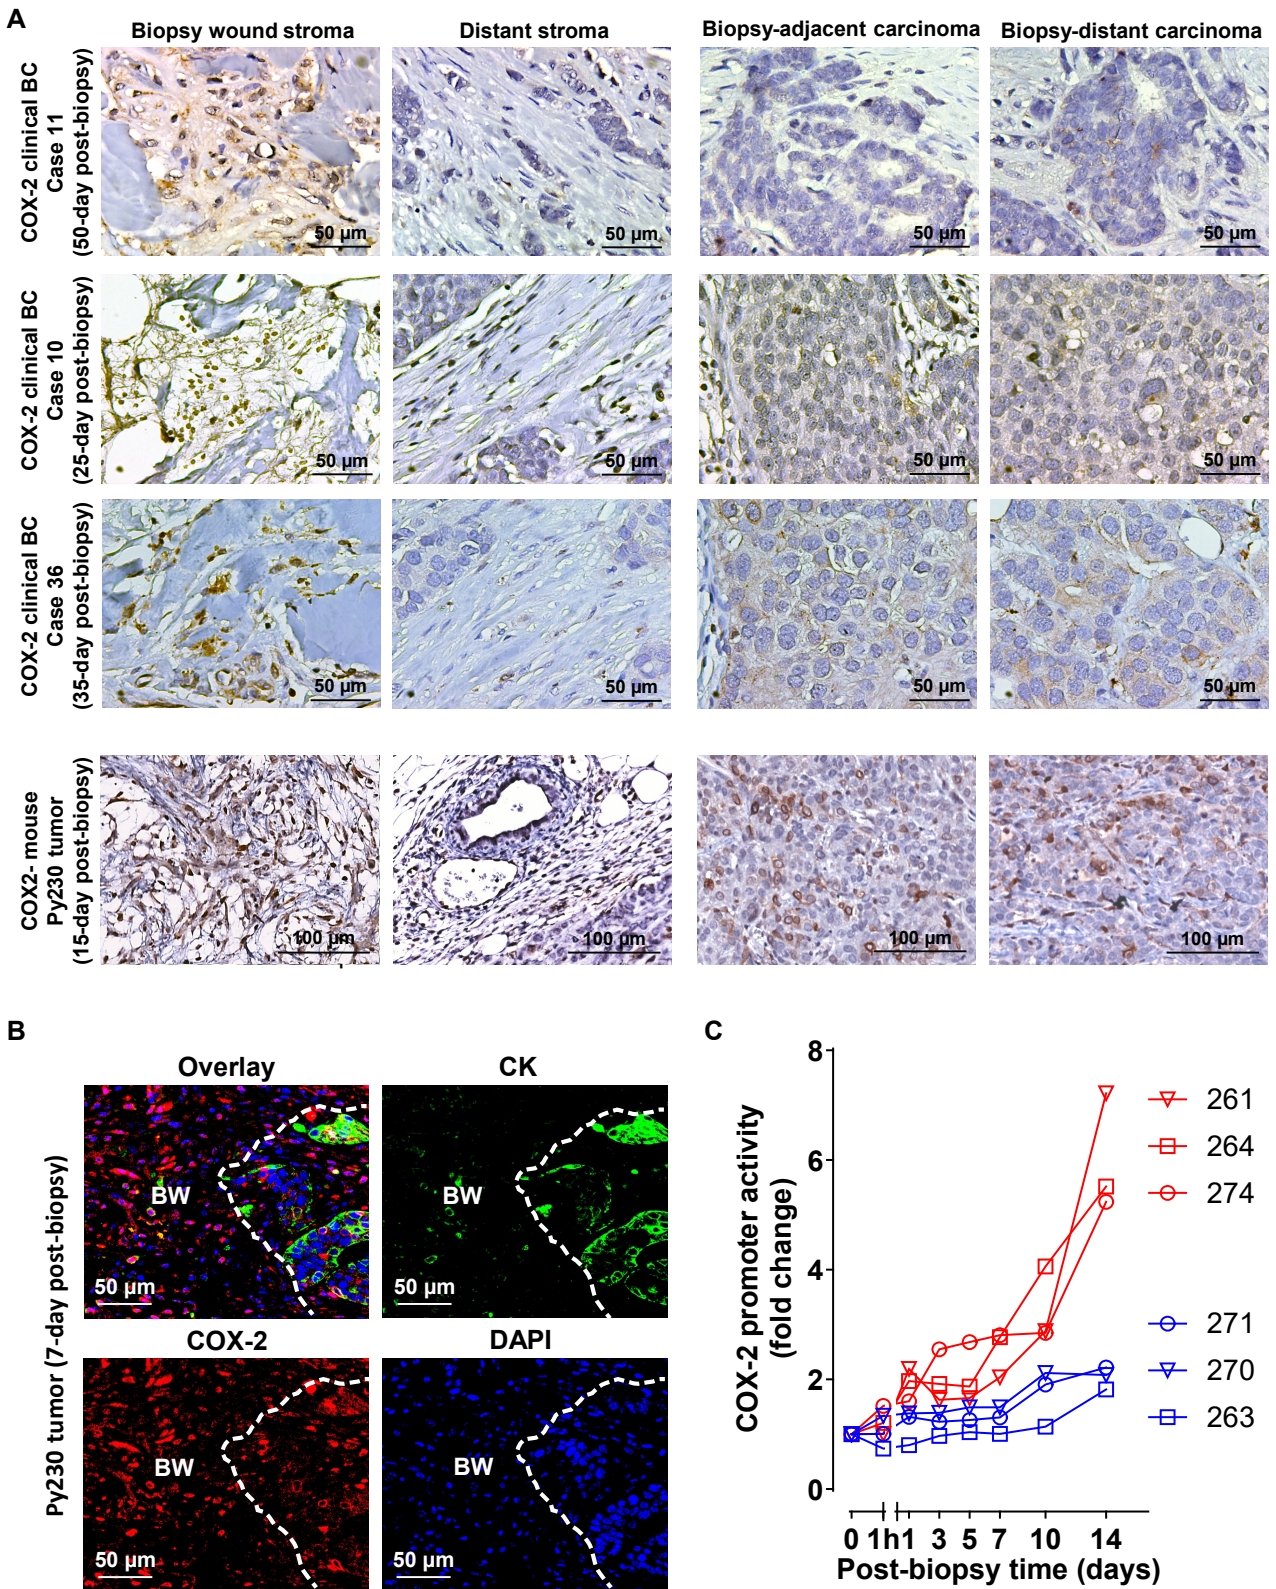

**Figure S4. Sustained COX-2 activation in stromal cells in the biopsy wound, related to Figure 4.**

(A) IHC staining images of COX-2 in biopsy wound stroma, peripheral stroma, carcinomas adjacent and distant from biopsy wound of three independent Stage I ER+ BC cases and 15-day post-biopsy Py230 tumor. (B) Multi-color immunofluorescent staining for CK (green), COX-2 (red), and DAPI (blue) of biopsied Py230 tumor. The white line depicts the border of biopsy wound (BW). (C) COX-2 promoter activity of individual mice before and after biopsy (red) and time-matched unbiopsied (blue) mice (n=3).

**Figure S5**

**A**

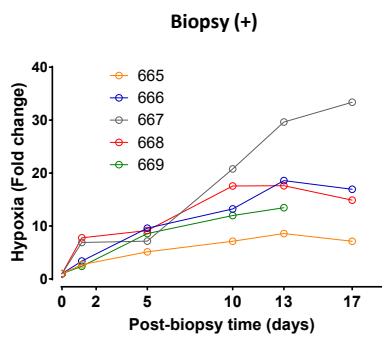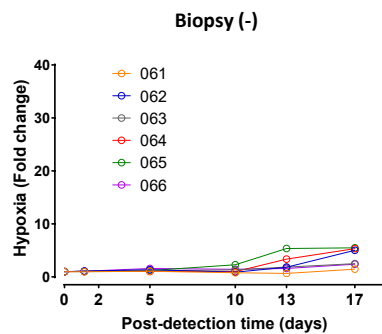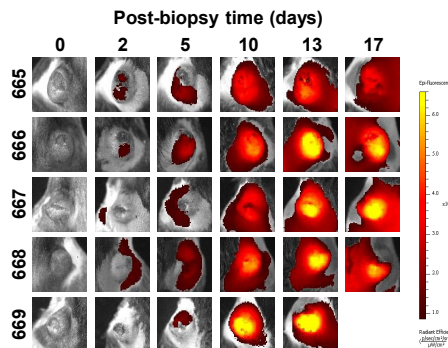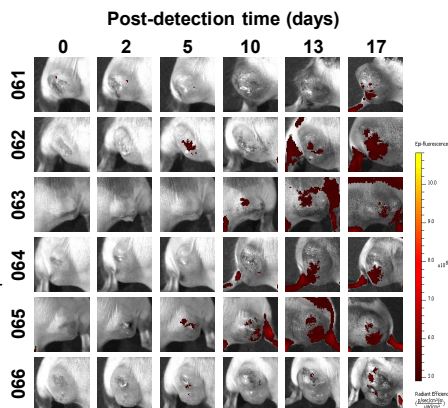

**B**

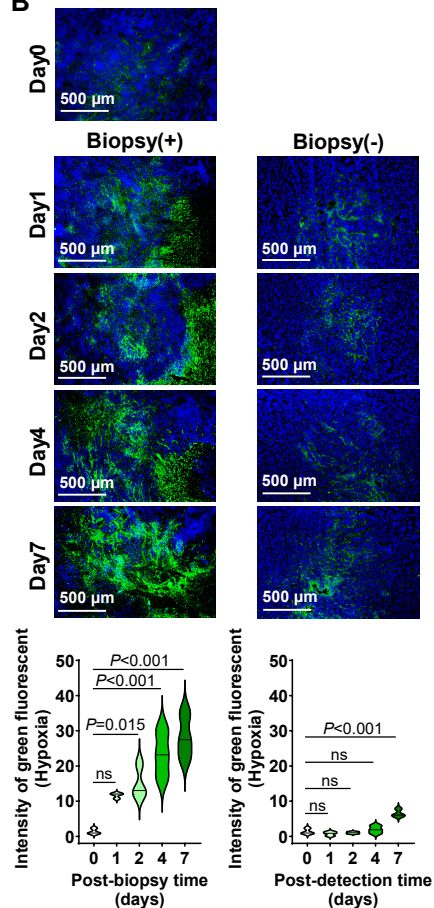

**C**

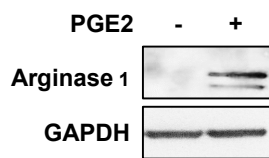

**D**

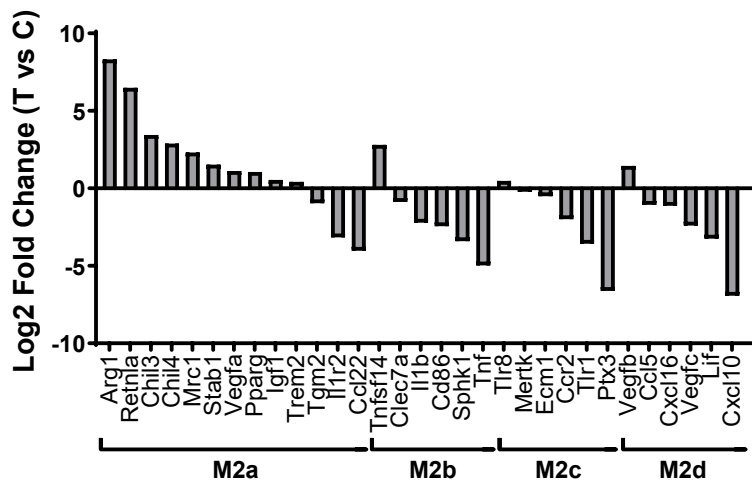

**E**

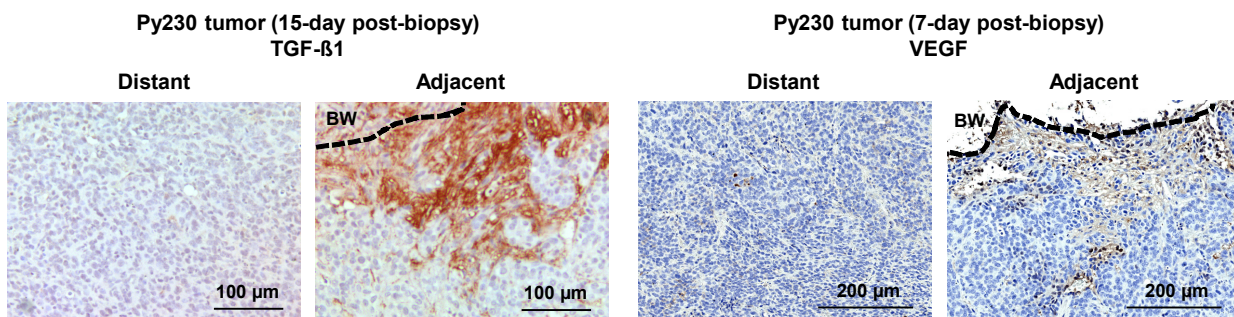

**Figure S5. Biopsy of tumor instigates spatially limited but prolonged hypoxia, related to Figure 5.**

(A) Hypoxia was measured at the indicated time after biopsy following the intravenous injection of HypoxySense® using IVIS imaging system. The graph depicts fold change of photons at each time point over time 0 (before biopsy) from individual tumors assigned to biopsy or unbiopsied control groups (n=6-7). Fluorescent images at the indicated time points show a flux of biopsied and unbiopsied tumors. (B) Images of biopsied Py230 tumors immunofluorescently stained for pimonidazole. Mice assigned to biopsy or unbiopsied groups were injected with pimonidazole HCL 2 h before tumor resection. Frozen sections were immunofluorescently stained following the vendor's instructions (n=3). The graph depicts the quantification of hypoxia measured by pixel count normalized by area using Image J software. *P*-values were calculated using one-way ANOVA, relative to time 0. (C) Western blot of Arginase-1 from M $\phi$  treated with or without PGE<sub>2</sub>. (D) Differential gene expression comparison of M2 subtype associated transcripts in B6 mouse M $\phi$  polarized by PGE<sub>2</sub> for 24 h under hypoxia over control. The Y-axis of the bar graph indicates the log<sub>2</sub> fold changes of M2 subgroups associated genes in B6 mouse M $\phi$  polarized by PGE<sub>2</sub> for 24 h under hypoxia over control. The selected genes associated with each subtype were reported in mouse (PMID3527030, 27683760, 27474165, 28402847, 37566293, 22730547, 32642590, 23684988). *Retn1a*, *Chil3*, *Chil4*, and *Mrc1* results were confirmed by qRT-PCR (n=3-5) due to lower sensitivity of RNA-seq. For all transcript changes shown, *P*-values <0.05. (E) IHC staining for VEGF and TGF- $\beta$ 1 of 7-day and 15-day post-biopsy Py230 tumors. The black dotted line depicts the border from the biopsy wound.

## Figure S6

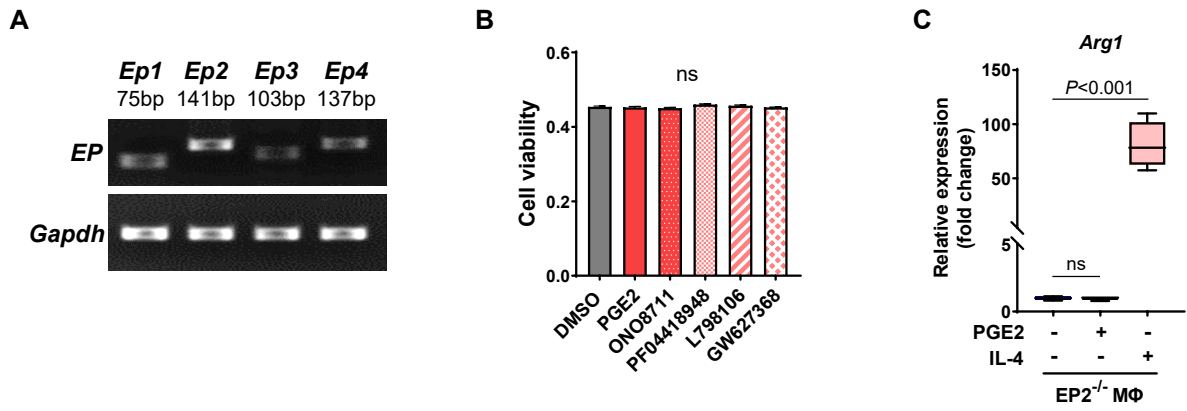

### Figure S6. Absence of PGE<sub>2</sub>-mediated M2-shift in EP2<sup>-/-</sup> Mφ, related to Figure 6.

(A) RT-qPCR analysis for mRNA expression of prostanoid receptors (*Ep1-Ep4*) in bone marrow-derived primary Mφ isolated from B6 mice. (B) MTT proliferation assay of Mφ treated with EP receptor selective antagonist at a concentration of 10 nM of ONO8711 (EP1), 1 μM of PF04418948 (EP2), 10 nM of L798106 (EP3), 1 μM of GW627368X (EP4) for 24h (n=5). Data were analyzed by one-way ANOVA, relative to untreated control. (C) RT-qPCR analysis of *Arg1* expression of *Ep2*<sup>-/-</sup> Mφ treated with PGE<sub>2</sub> or interleukin 4 (IL4) (n=3). *P*-values were calculated using one-way ANOVA, relative to control.

**Figure S7**

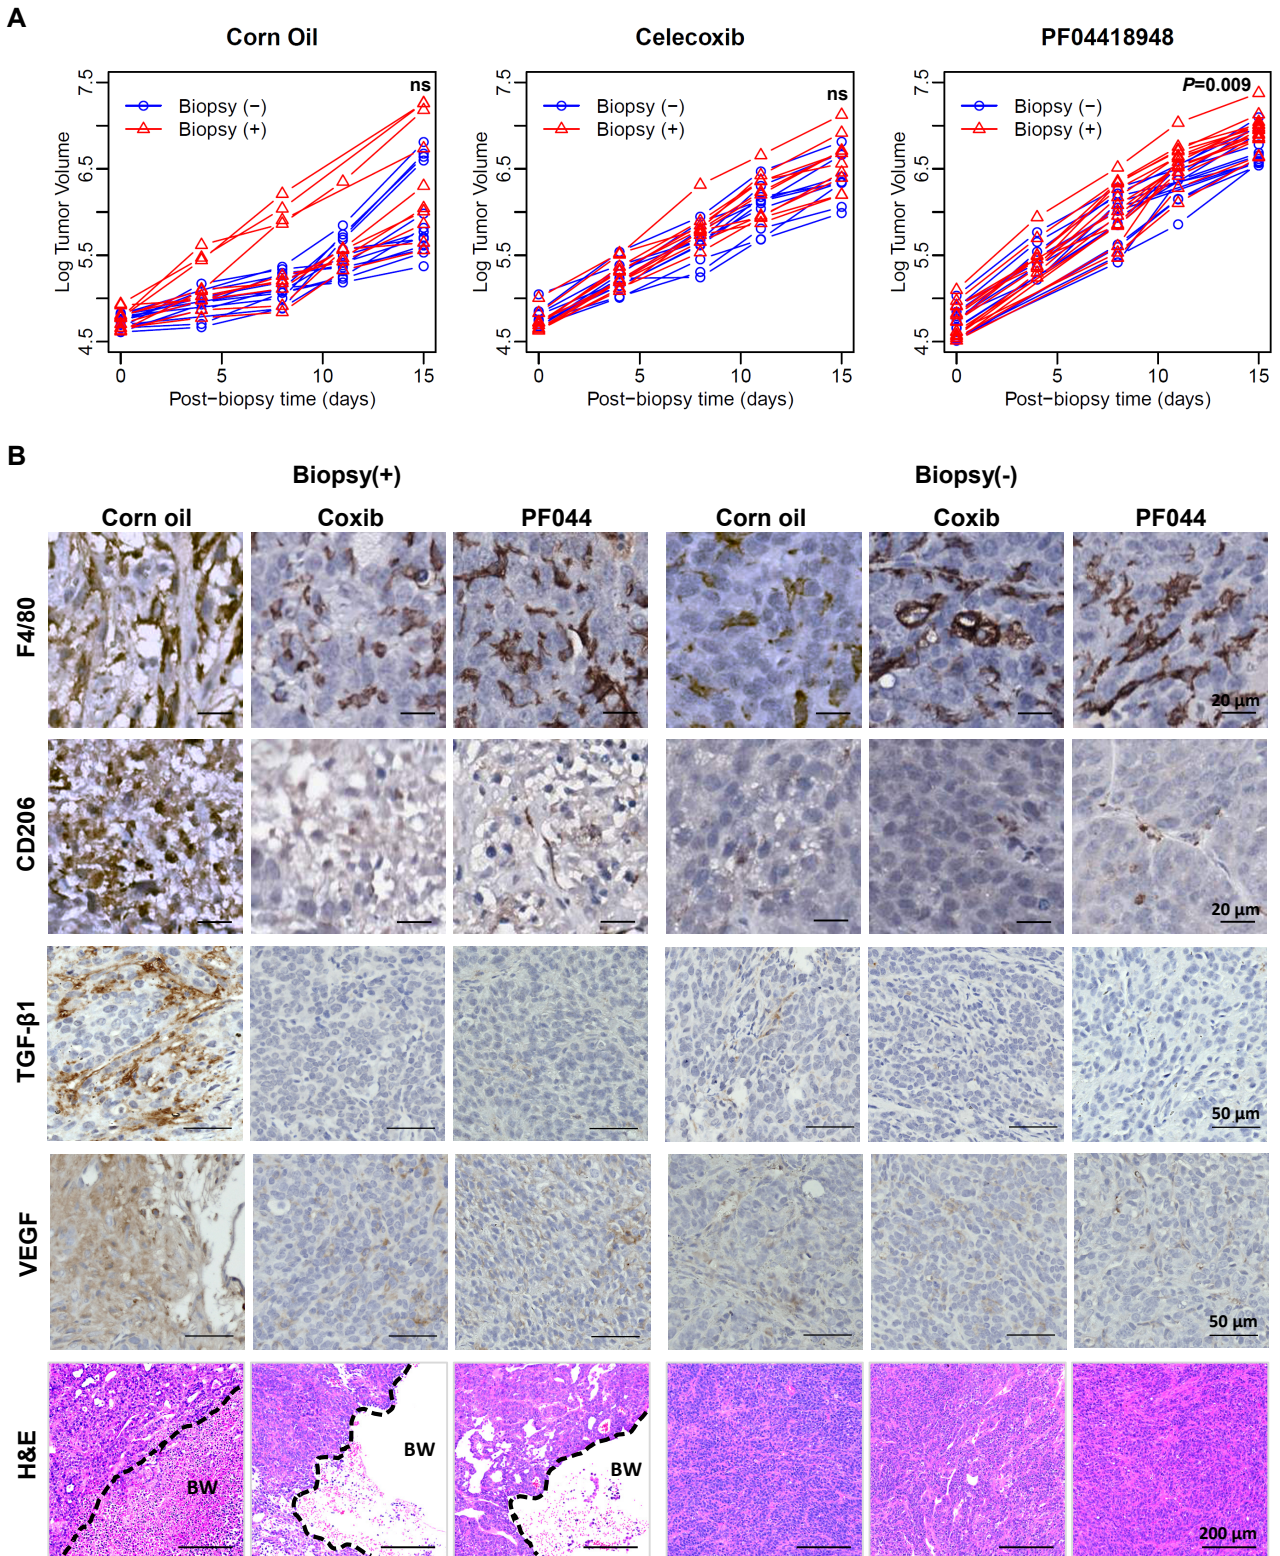

**Figure S7. Oral administration of NSAIDs after biopsy inhibits biopsy-induced M2-polarization, related to Figure 7.**

(A) Py230<sup>mCherry</sup> tumor growth rate in mice assigned to experiments corresponding to Fig. 7A. One day after the biopsy, the mice were orally administered with either corn oil (control, n=10-11), celecoxib (n=10), or PF04418948 (n=13-15) in food *ad libitum*. The tumor volume of each mouse was plotted over post-biopsy days (biopsy as day 0). *P*-values at study endpoint were calculated using Student's T-test. (B) IHC staining images for F4/80, CD206, TGF-β1, VEGF (brown), and Hematoxylin counterstaining (blue). H&E images of biopsied or unbiopsied tumors derived from mice administered with corn oil, celecoxib, or PF04418948. The black dotted line indicates the border of the biopsy wound. BW: biopsy wound.

## Table S1

**Table S1. Exclusion scheme for the cohort of Stage I-II BC patients from the National Cancer Database, related to Figure 1.**

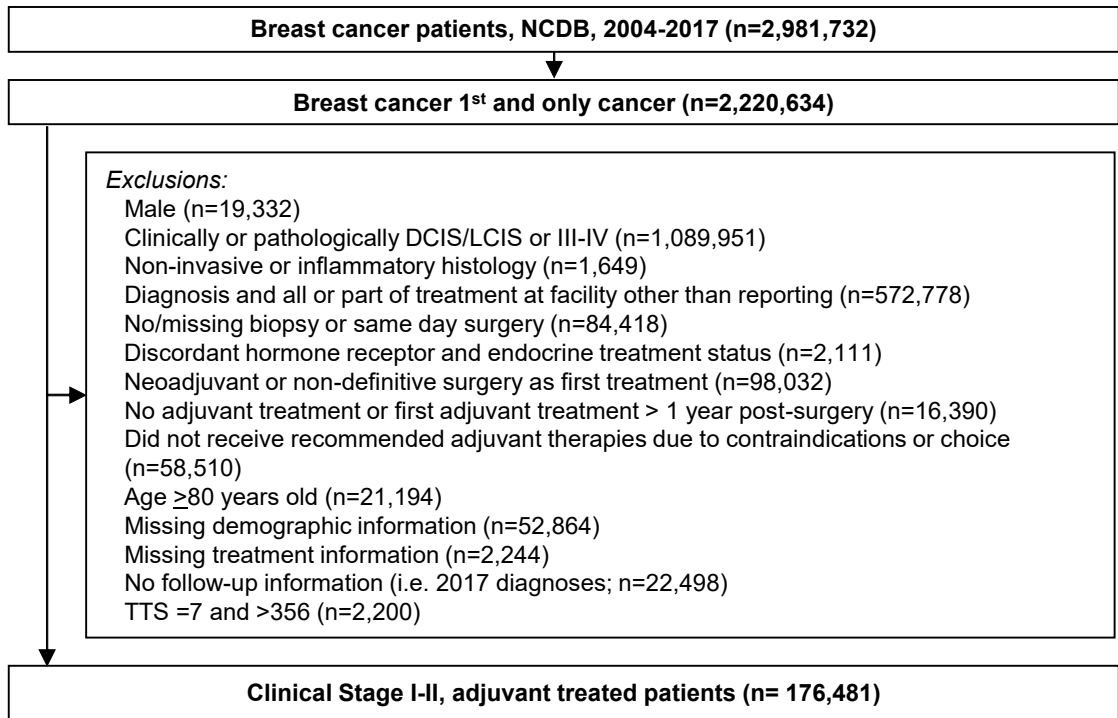

**Table S2****Table S2. Median and Quartiles of biopsy-to-surgery interval (days) by demographic and clinical characteristics of the cohort, related to Figure 1.**

|                                            | N (%)          | Q1 | Median | Q3 |
|--------------------------------------------|----------------|----|--------|----|
| <b>Overall</b>                             | 176481 (100)   | 20 | 28     | 41 |
| <b>Age</b>                                 |                |    |        |    |
| <30                                        | 587 (0.33)     | 19 | 29     | 41 |
| 30-39                                      | 5815 (3.29)    | 20 | 29     | 43 |
| 40-49                                      | 28895 (16.37)  | 20 | 30     | 43 |
| 50-59                                      | 48421 (27.44)  | 20 | 28     | 41 |
| 60-69                                      | 56535 (32.03)  | 20 | 28     | 41 |
| ≥70                                        | 36228 (20.53)  | 20 | 28     | 40 |
| <b>Race</b>                                |                |    |        |    |
| White                                      | 143848 (81.51) | 20 | 28     | 40 |
| Hispanic                                   | 8523 (4.83)    | 24 | 35     | 51 |
| Black                                      | 17882 (10.13)  | 22 | 34     | 49 |
| Other                                      | 6228 (3.53)    | 21 | 31     | 45 |
| <b>Comorbidity</b>                         |                |    |        |    |
| 0                                          | 147363 (83.50) | 20 | 28     | 41 |
| 1                                          | 23383 (13.25)  | 20 | 29     | 42 |
| ≥2                                         | 5735 (3.25)    | 21 | 31     | 44 |
| <b>Year of Diagnosis</b>                   |                |    |        |    |
| 2004                                       | 3835 (2.17)    | 15 | 22     | 33 |
| 2005                                       | 4444 (2.52)    | 16 | 23     | 34 |
| 2006                                       | 5357 (3.04)    | 16 | 23     | 34 |
| 2007                                       | 6640 (3.76)    | 18 | 27     | 38 |
| 2008                                       | 12434 (7.05)   | 18 | 27     | 39 |
| 2009                                       | 15300 (8.67)   | 19 | 28     | 39 |
| 2010                                       | 15165 (8.59)   | 19 | 28     | 40 |
| 2011                                       | 16763 (9.50)   | 20 | 28     | 40 |
| 2012                                       | 16906 (9.58)   | 20 | 29     | 42 |
| 2013                                       | 17769 (10.07)  | 21 | 29     | 42 |
| 2014                                       | 19691 (11.16)  | 21 | 30     | 43 |
| 2015                                       | 20796 (11.78)  | 21 | 31     | 44 |
| 2016                                       | 21381 (12.12)  | 22 | 31     | 44 |
| <b>Clinical Stage<sup>a</sup></b>          |                |    |        |    |
| I                                          | 132865 (75.29) | 20 | 28     | 41 |
| II                                         | 43616 (24.71)  | 20 | 29     | 42 |
| <b>Histology Type</b>                      |                |    |        |    |
| Ductal                                     | 144283 (81.76) | 20 | 28     | 41 |
| Lobular                                    | 14316 (8.11)   | 21 | 31     | 44 |
| Ductal and Lobular                         | 9174 (5.20)    | 21 | 30     | 43 |
| Other                                      | 8708 (4.93)    | 20 | 28     | 41 |
| <b>Histology Grade</b>                     |                |    |        |    |
| 1                                          | 50553 (28.65)  | 20 | 29     | 41 |
| 2                                          | 79348 (44.96)  | 20 | 29     | 42 |
| >3                                         | 46580 (26.39)  | 19 | 28     | 40 |
| <b>Type of Surgery</b>                     |                |    |        |    |
| Breast Conserving                          | 125297 (71.00) | 19 | 27     | 38 |
| Mastectomy                                 | 31554 (17.88)  | 20 | 29     | 42 |
| Mastectomy with Reconstruction             | 19630 (11.12)  | 28 | 40     | 54 |
| <b>Urban/Rural Status<sup>b</sup></b>      |                |    |        |    |
| Metro ≥ 1 million                          | 90102 (51.05)  | 21 | 30     | 43 |
| Metro < 1 million                          | 60932 (34.53)  | 19 | 28     | 40 |
| Urban/Rural                                | 25447 (14.42)  | 17 | 26     | 36 |
| <b>Endocrine Therapy</b>                   |                |    |        |    |
| No                                         | 29983 (16.99)  | 19 | 27     | 39 |
| Yes                                        | 146498 (83.01) | 20 | 29     | 42 |
| <b>Chemotherapy/Biological</b>             |                |    |        |    |
| No                                         | 104659 (59.30) | 20 | 29     | 42 |
| Yes                                        | 71822 (40.70)  | 19 | 28     | 40 |
| <b>Radiation Therapy</b>                   |                |    |        |    |
| No                                         | 51608 (29.24)  | 22 | 33     | 47 |
| Yes                                        | 124873 (70.76) | 19 | 27     | 39 |
| <b>Hormone Receptor</b>                    |                |    |        |    |
| Positive                                   | 154126 (87.33) | 20 | 29     | 42 |
| Negative                                   | 22355 (12.67)  | 18 | 27     | 38 |
| <b>Type of First Adjuvant Therapy</b>      |                |    |        |    |
| Radiation                                  | 64470 (36.53)  | 31 | 42     | 55 |
| Chemotherapy/BRM                           | 67478 (38.24)  | 30 | 40     | 51 |
| Endocrine Therapy                          | 44533 (25.23)  | 21 | 33     | 48 |
| <b>Insurance type</b>                      |                |    |        |    |
| Not Insured                                | 3372 (1.91)    | 22 | 34     | 52 |
| Private Insurance                          | 101483 (57.50) | 20 | 28     | 41 |
| Medicaid                                   | 10357 (5.87)   | 22 | 34     | 50 |
| Medicare                                   | 52719 (29.87)  | 20 | 28     | 40 |
| Other Government                           | 8550 (4.84)    | 21 | 30     | 44 |
| <b>% No High School Degree<sup>c</sup></b> |                |    |        |    |
| ≥ 29%                                      | 24212 (13.72)  | 21 | 30     | 45 |
| 20-28.9%                                   | 36578 (20.73)  | 20 | 29     | 42 |
| 14-19.9%                                   | 41417 (23.47)  | 20 | 28     | 41 |
| < 14%                                      | 74274 (42.09)  | 20 | 28     | 40 |
| <b>Median Income<sup>c</sup></b>           |                |    |        |    |
| < \$30,000                                 | 18613 (10.55)  | 20 | 29     | 43 |
| \$30,000 – \$34,999                        | 27939 (15.83)  | 19 | 28     | 41 |
| \$35,000 – \$45,999                        | 48698 (27.59)  | 20 | 28     | 41 |
| > \$46,000                                 | 81231 (46.03)  | 20 | 29     | 41 |

a. Clinical Group Stage derived from AJCC 6th or 7th ed. Staging Manual. b. Urban/Rural Status derived from the 2000 USDA Economic Research Service Urban-Rural continuum codes. c. Education (% no high school degree) and median income quartiles for patient's ZIP-code of residence at time of diagnosis derived from year 2000 US Census data.

## Table S3

**Table S3. Clinical and demographic characteristics of cases, related to Figure 2-3.**

| A. EMT histologic analyses |              | B. M2Φ histologic analyses |              |
|----------------------------|--------------|----------------------------|--------------|
| Total case                 | 12           | Total case                 | 14           |
| Preoperative interval      | 29.4 (12-54) | Preoperative interval      | 28.8 (10-54) |
| Age                        | 62.9 ± 9.7   | Age                        | 63.1 ± 10.1  |
| Race                       |              | Race                       |              |
| White                      | 9            | White                      | 11           |
| Other                      | 2            | Other                      | 2            |
| Unknown                    | 1            | Unknown                    | 1            |
| pT                         |              | pT                         |              |
| I                          | 10           | I                          | 12           |
| II                         | 2            | II                         | 2            |
| pN                         |              | pN                         |              |
| Negative                   | 9            | Negative                   | 12           |
| Positive                   | 3            | Positive                   | 2            |
| Grade                      |              | Grade                      |              |
| I                          | 3            | I                          | 4            |
| II                         | 5            | II                         | 7            |
| III                        | 4            | III                        | 3            |
| Luminal                    |              | Luminal                    |              |
| A                          | 8            | A                          | 11           |
| B                          | 4            | B                          | 3            |



## Table S4

**Table S4. List of primer sequences used in this study, related to STAR Methods.**

| RT-qPCR       |                                    |                                    |           |         |
|---------------|------------------------------------|------------------------------------|-----------|---------|
| Gene          | Forward Primer (5'-3')             | Reverse Primer (5'-3')             | Size (bp) | Tm (°C) |
| <i>Arg1</i>   | CTTGCGAGACGTAGACCCTG               | GCCAATCCCCAGCTTGTCTA               | 94        | 57.3    |
| <i>Ym1</i>    | TCATTACCCTGATAGGCATAGG             | TTATCCTGAGTGACCCTTCTAAG            | 184       | 53.4    |
| <i>Ym2</i>    | GCTGGACCACCAGGAAAGTA               | TCAGTGGCTCCTTCATTGAGA              | 86        | 55.8    |
| <i>LIGHT</i>  | CTGCATCAACGTCTTGGAGA               | GATACGTCAAGCCCCTCAAG               | 205       | 57.9    |
| <i>Fizz-1</i> | GGTCCCAGTGCATATGGATGAGACC<br>ATAGA | CACCTCTTCACTCGAGGGACAGTTG<br>GCAGC | 296       | 67.0    |
| <i>CD206</i>  | GGATTGCCCTGAACAGCAAC               | ACTTAAGCTTCGGCTCGTCA               | 102       | 59.7    |
| <i>Gapdh</i>  | AGGTCGGTGTGAACGGATTTG              | TGTAGACCATGTAGTTGAGGTCA            | 123       | 55.1    |

| Genotyping |           |                        |                        |           |                  |
|------------|-----------|------------------------|------------------------|-----------|------------------|
| Target     | Name      | Forward Primer (5'-3') | Reverse Primer (5'-3') | Size (bp) | Tm (°C)          |
| COX-2      | Mutant    | CCATTAGCAGCCAGTTGTCA   | AGCCTTATGCAGTTGCTCTC   | 225       | F:58.2<br>R:58.0 |
|            | Wild type | CCATTAGCAGCCAGTTGTCA   | TGCTAGAAAGGGGGTCTGAG   | 245       | F:58.2<br>R:58.4 |
| EP2        | Mutant    | ATTAAGGGCCAGCTCATTCC   | CGTACTCCCCGTAGTTGAGC   | 300       | F:57.6<br>R:59.9 |
|            | Wild type | TGCTCATGCTCTTCGCTATG   | CGTACTCCCCGTAGTTGAGC   | 165       | F:58.1<br>R:59.9 |
